# Supplementary material
Source: PubMed Central journal article supplement (PMC2813218)
Supplement: NIHMS168115-supplement-01.pdf [file NIHMS168115-supplement-01.pdf]

**Supplemental Data****Eukaryotic Stress Granules:****The Ins and Out of Translation****J. Ross Buchan and Roy Parker****Table S1: Components of Stress Granules and P-bodies**

| <b>Factor</b>        | <b>Properties and Implicated function</b>                                                                                                                           | <b>Location</b>             | <b>Organism</b> | <b>Ref</b>                                                    |
|----------------------|---------------------------------------------------------------------------------------------------------------------------------------------------------------------|-----------------------------|-----------------|---------------------------------------------------------------|
| <b>40S</b>           | Small subunit of ribosomes                                                                                                                                          | Polysomes, SGs              | Mammals, yeast  | Kedersha et al, 2002; Grousl et al, 2009                      |
| <b>Ago2</b>          | miRNA silencing; siRNA cleavage                                                                                                                                     | Polysomes, SGs, PBs         | Mammals         | Leung et al, 2006                                             |
| <b>AKAP350</b>       | Cell signaling scaffold; centrosome/golgi associated                                                                                                                | SGs                         | Mammals         | Kolobova et al, 2009                                          |
| <b>APOBEC3 G</b>     | Antiviral factor                                                                                                                                                    | SGs, PBs                    | Mammals         | Gallois-Montbrun et al, 2007                                  |
| <b>Ataxin-2/Pbp1</b> | Ataxin-2: regulates SG/PB assembly; Implicated in Spinocerebellar ataxia 2<br>Pbp1: poly(A) tail processing; splicing; export; translational regulator; SG assembly | Polysomes, SGs, PBs (yeast) | Mammals, yeast  | Nonhoff et al, 2007<br>Buchan et al, 2008                     |
| <b>BRF1</b>          | mRNA decay                                                                                                                                                          | SGs, PBs                    | Mammals         | Kedersha et al, 2005                                          |
| <b>Calreticulin</b>  | ER Chaperone; RNA binding protein                                                                                                                                   | SGs                         | Mammals         | Decca et al, 2007                                             |
| <b>Caprin1</b>       | Associated with cell cycle proliferation; RNA binding protein; Nucleates SGs                                                                                        | Polysomes, SGs              | Mammals         | Solomon et al, 2007;                                          |
| <b>CCAR1</b>         | Apoptosis regulator; DNA/RNA binding protein                                                                                                                        | SGs                         | Mammals         | Kolobova et al, 2009                                          |
| <b>Ccr4</b>          | mRNA stability (Deadenylation)                                                                                                                                      | PBs                         | Mammals, yeast  | Sheth and Parker, 2003; Andrei et al, 2005                    |
| <b>CIRP</b>          | Translational regulator; Nucleates SGs                                                                                                                              | SGs                         | Mammals         | De Leeuw et al, 2007                                          |
| <b>CPEB</b>          | Translational regulator; Nucleates SGs                                                                                                                              | SGs, PBs                    | Mammals         | Wilczynska et al, 2005                                        |
| <b>CUG-BP1</b>       | mRNA splicing; translational regulator; mRNA stability; Implicated in myotonic dystrophy                                                                            | SGs                         | Mammals         | Fujimura et al, 2007                                          |
| <b>Dcp1/Dcp1a</b>    | mRNA decay (decapping)                                                                                                                                              | SGs, PBs                    | Mammals, yeast  | Sheth et al, 2003; Cougot et al, 2004; Wilczynska et al, 2005 |

|                  |                                                                          |                             |                |                                           |
|------------------|--------------------------------------------------------------------------|-----------------------------|----------------|-------------------------------------------|
| <b>Dcp2/Dcp2</b> | mRNA decay (decapping)                                                   | PBs                         | Mammals, yeast | Sheth et al, 2003; Cougot et al, 2004;    |
| <b>DDX1</b>      | RNA helicase; 3' end formation                                           | SGs                         | Mammals        | Ishiura et al, 2008                       |
| <b>DDX3/Ded1</b> | RNA helicase; translational regulator; mRNA export                       | Polysomes, SGs, PBs (yeast) | Mammals, yeast | Lai et al, 2008; Beckham et al, 2007      |
| <b>DIC1/DHC1</b> | Dynein Intermediate chain/Dynein Heavy chain                             | SGs                         | Mammals        | Loschi et al, 2009                        |
| <b>DIS1</b>      | Implicated in Schizophrenia; Nucleates SGs                               | SGs                         | Mammals        | Ogawa et al, 2005                         |
| <b>Eap1</b>      | eIF4E binding protein                                                    | SGs, PBs                    | Yeast          | Buchan et al, 2008                        |
| <b>Ebs1</b>      | NMD factor                                                               | PBs                         | Yeast          | Luke et al, 2007                          |
| <b>Edc1-2</b>    | Decapping enhancer; translational regulator                              | PBs                         | Yeast          | Neef and Thiele, 2009                     |
| <b>Edc3</b>      | mRNA stability; PB assembly                                              | PBs                         | Yeast          | Kshirsagar and Parker, 2004               |
| <b>eIF2</b>      | Initiation factor; recruits initiator tRNA                               | Polysomes, SGs              | Mammals        | Kimbal et al, 2003                        |
| <b>eIF2B</b>     | Guanine exchange factor for eIF2                                         | Polysomes, SGs              | Mammals        | Kimbal et al, 2003                        |
| <b>eIF3</b>      | Multi-subunit initiation factor                                          | Polysomes, SGs, PBs (yeast) | Mammals, yeast | Kedersha et al, 2002; Grousl et al, 2009  |
| <b>eIF4A</b>     | RNA helicase; eIF4F initiation factor                                    | Polysomes, SGs              | Mammals        | Kedersha et al, 2000                      |
| <b>eIF4E</b>     | Cap binding protein; eIF4F initiation factor                             | Polysomes, SGs, PBs (yeast) | Mammals, yeast | Kedersha et al, 2002; Hoyle et al, 2007   |
| <b>eIF4E-T</b>   | eIF4E binding protein                                                    | PBs                         | Mammals        | Andrei et al, 2005                        |
| <b>eIF4G</b>     | eIF4F scaffold; initiation factor                                        | Polysomes, SGs, PBs (yeast) | Mammals, yeast | Kedersha et al, 2002; Hoyle et al, 2007   |
| <b>eRF1</b>      | Translation termination                                                  | Polysomes, PBs (yeast)      | Mammals, yeast | Buchan et al, 2008                        |
| <b>eRF3</b>      | Translation termination                                                  | Polysomes, PBs (yeast)      | Mammals, yeast | Dori and Choder, 2007; Buchan et al, 2008 |
| <b>FAK</b>       | Kinase; phosphorylates Grb7                                              | SGs                         | Mammals        | Tsai et al, 2008                          |
| <b>FAST</b>      | Kinase; splicing; anti-apoptotic regulator                               | SGs, PBs                    | Mammals        | Kedersha et al, 2005                      |
| <b>FBP/KSRP</b>  | mRNA decay                                                               | SGs                         | Mammals        | Rothe et al, 2006                         |
| <b>FMRP</b>      | Translational regulator; Nucleates SGs; Implicated in Fragile X syndrome | Polysomes, SGs              | Mammals        | Mazroui et al, 2002                       |
| <b>FXR1P</b>     | Translational regulator                                                  | Polysomes, SGs              | Mammals        | Mazroui et al, 2002                       |
| <b>FXR2P</b>     | Translational regulator                                                  | Polysomes, SGs              | Mammals        | Mazroui et al, 2002                       |
| <b>G3BP</b>      | Ras signaling; SG assembly; endonuclease                                 | SGs                         | Mammals        | Tourriere et al, 2003                     |

|                    |                                                                                                |                     |                |                                               |
|--------------------|------------------------------------------------------------------------------------------------|---------------------|----------------|-----------------------------------------------|
| <b>Gbp2</b>        | Export                                                                                         | SGs, PBs            | Yeast          | Buchan et al, 2008                            |
| <b>Ge-1/Hedls</b>  | Decapping enhancer                                                                             | PBs                 | Mammals        | Yu et al, 2005                                |
| <b>Grb7</b>        | Translational regulator; Nucleates SGs; SG disassembly role                                    | SGs                 | Mammals        | Tsai et al, 2008                              |
| <b>GW182</b>       | miRNA silencing                                                                                | PBs                 | Mammals        | Eystathioy et al, 2003                        |
| <b>hMex3A</b>      | Translation regulator                                                                          | PBs                 | Mammals        | Buchet-Poyau et al, 2007                      |
| <b>hMex3B</b>      | Translation regulator                                                                          | SGs, PBs            | Mammals        | Courchet et al, 2008                          |
| <b>hnRNP A1</b>    | Splicing; export; translational regulator; mRNA stability                                      | SGs                 | Mammals        | Guil et al, 2006                              |
| <b>hnRNP A3</b>    | Translational regulator; export                                                                | PBs                 | Mammals        | Kaahira et al, 2008                           |
| <b>hnRNP K</b>     | Chromatin remodeling; transcription; splicing; export; translational regulator; mRNA stability | SGs                 | Mammals        | Fukuda et al, 2009                            |
| <b>hnRNP Q</b>     | Splicing; export; translational regulator; mRNA stability                                      | SGs, PBs            | Mammals        | Quaresma et al, 2009                          |
| <b>Hrp1</b>        | 3' end processing; export                                                                      | SGs, PBs            | Yeast          | Buchan et al, 2008                            |
| <b>Htt</b>         | Huntington protein; implicated in Huntingdon's disease                                         | PBs                 | Mammals        | Savas et al, 2008                             |
| <b>Hsp27</b>       | Heat shock protein                                                                             | SGs                 | Mammals        | Kedersha et al, 1999                          |
| <b>HuD</b>         | mRNA stability                                                                                 | SGs                 | Mammals        | Burly and Smith, 2006                         |
| <b>HuR</b>         | mRNA stability; splicing regulator; poly(A) site selection                                     | Polysomes, SGs      | Mammals        | Gallouzi et al, 2000                          |
| <b>IP5K</b>        | Generates InsP6                                                                                | SGs                 | Mammals        | Brehm et al, 2007                             |
| <b>Importin-8</b>  | Importin                                                                                       | PBs, SGs            | Mammals        | Weinmann et al, 2009                          |
| <b>KHC/KLC</b>     | Kinesin heavy chain/Kinesin Light Chain                                                        | SGs                 | Mammals        | Loschi et al, 2009                            |
| <b>Lin28</b>       | Translational regulator                                                                        | Polysomes, SGs, PBs | Mammals        | Balzer and Moss, 2007; Polesskaya et al, 2007 |
| <b>LINE1 ORF1p</b> | Transposon protein                                                                             | SGs                 | Mammals        | Goodier et al, 2007                           |
| <b>Lsm1</b>        | mRNA stability                                                                                 | PBs                 | Mammals, yeast | Sheth and Parker, 2003; Stoecklin et al, 2006 |
| <b>MBNL1</b>       | Splicing; mRNA stability; Implicated in myotonic dystrophy                                     | SGs                 | Mammals        | Ishiura et al, 2008                           |
| <b>MEX67</b>       | Major mRNA export factor                                                                       | SGs                 | Mammals        | Lai et al, 2008                               |
| <b>MLN51</b>       | Exon-Junction complex component (splicing)                                                     | SGs                 | Mammals        | Baguet et al, 2007                            |
| <b>Musashi</b>     | Translational regulator                                                                        | SGs                 | Mammals        | Kawahara et al, 2008                          |
| <b>Nrp1</b>        | Putative RNA binding protein                                                                   | SGs, PBs            | Yeast          | Buchan et al, 2008                            |
|                    |                                                                                                |                     |                |                                               |

|                        |                                                                                                     |                             |                |                                              |
|------------------------|-----------------------------------------------------------------------------------------------------|-----------------------------|----------------|----------------------------------------------|
| <b>NXF7</b>            | Cytoplasmic mRNA transport                                                                          | Polysomes, SGs, PBs         | Mammals        | Katahira et al, 2008                         |
| <b>p97/NAT1</b>        | eIF4G homolog; translational regulator                                                              | Polysomes, SGs              | Mammals        | Nousch et al, 2007                           |
| <b>PABP/Pab1</b>       | Poly(A) binding protein; stimulates translation; mRNA stability                                     | Polysomes, SGs, PBs (yeast) | Mammals, yeast | Kedersha et al, 1999; Hoyle et al, 2007      |
| <b>Pan2/3</b>          | mRNA stability (Deadenylation)                                                                      | PBs                         | Mammals        | Zheng et al, 2008                            |
| <b>Pat1</b>            | Translational regulator; mRNA stability (decapping enhancer)                                        | PBs                         | Mammals, yeast | Sheth and Parker, 2003; Scheller et al, 2007 |
| <b>PCBP2</b>           | Stimulates IRES translation                                                                         | SGs, PBs                    | Mammals        | Fujimura et al, 2008                         |
| <b>Plakophilin 1/3</b> | Cell-Cell adhesion                                                                                  | SGs                         | Mammals        | Hoffman et al, 2006                          |
| <b>PMR1</b>            | mRNA decay (endonuclease)                                                                           | Polysomes, SGs, PBs         | Mammals        | Yang et al, 2006                             |
| <b>Pop2/Caf1</b>       | mRNA stability (Deadenylation)                                                                      | PBs                         | Mammals, yeast | Teixeira and Parker, 2005; Zheng et al, 2008 |
| <b>Prohibitin 2</b>    | Mitochondrial apoptosis regulator                                                                   | SGs                         | Mammals        | Ohn et al, 2008                              |
| <b>PRTB</b>            | Translational regulator; Nucleates SGs                                                              | SGs                         | Mammals        | Kim et al, 2008                              |
| <b>Pum1</b>            | Cytoplasmic RNA binding protein; Ortholog of pumilio ( <i>Drosophila</i> ) and Puf (yeast) proteins | SGs                         | Mammals        | Morris et al, 2008                           |
| <b>Pum2</b>            | Translational regulator; nucleates SGs                                                              | SGs                         | Mammals        | Vessey et al, 2006                           |
| <b>RACK1</b>           | Cell signaling scaffold protein; apoptotic regulator                                                | Polysomes, SGs              | Mammals        | Arimoto et al, 2008                          |
| <b>RBM42</b>           | Nuclear mRNA binding protein                                                                        | SGs                         | Mammals        | Fukuda et al, 2009                           |
| <b>Rap55/Scd6</b>      | PB assembly role (mammals)                                                                          | SGs, PBs                    | Mammals, yeast | Yang et al, 2006; Barbee et al, 2006         |
| <b>RCK/Dhh1</b>        | RNA helicase; Translational regulator                                                               | Polysomes, SGs, PBs         | Mammals, yeast | Wilczynska et al, 2005; Sheth et al, 2003    |
| <b>RHAU</b>            | RNA helicase; mRNA stability                                                                        | SGs                         | Mammals        | Chalupnikova et al, 2008                     |
| <b>Roquin</b>          | mRNA stability                                                                                      | SGs, PBs                    | Mammals        | Vinuesa et al; 2005; Yu et al, 2007          |
| <b>Rpm2</b>            | RNase P subunit; transcriptional regulator                                                          | PBs                         | Yeast          | Stribinskis and Ramos, 2007                  |
| <b>RSK2</b>            | Ribosomal S6 kinase; anti-apoptotic regulator                                                       | Polysomes, SGs              | Mammals        | Eisinger-Mathason et al, 2008                |
| <b>Sam68</b>           | Translational regulator                                                                             | SGs                         | Mammals        | Henano-Mejia and He, 2009                    |
| <b>SERBP1</b>          | mRNA stability                                                                                      | SGs                         | Mammals        | Goulet et al, 2008                           |
| <b>SGNP</b>            | Putative rRNA processing factor                                                                     | SGs                         | Mammals        | Zhu et al, 2008                              |

|                   |                                                                                                                            |                              |                |                                                             |
|-------------------|----------------------------------------------------------------------------------------------------------------------------|------------------------------|----------------|-------------------------------------------------------------|
| <b>Smaug 1</b>    | Translational regulator                                                                                                    | SGs                          | Mammals        | Baez and Boccaccio, 2005                                    |
| <b>Staufen</b>    | Translational regulator                                                                                                    | Polysomes, SGs               | Mammals        | Thomas et al, 2005                                          |
| <b>SMN</b>        | snRNP assembly                                                                                                             | Polysomes (?), SGs, U-bodies | Mammals        | Bechade et al, 1999; Hua and Zhou, 2004; Liu and Gall, 2007 |
| <b>TDP-43</b>     | DNA/RNA binding; splicing regulator; mRNA transport                                                                        | SGs                          | Mammals        | Colombrita et al, 2009                                      |
| <b>TDRD3</b>      | Tudor/Ub-binding protein                                                                                                   | Polysomes, SGs               | Mammals        | Gouillet et al, 2008                                        |
| <b>TIA-1/Pub1</b> | TIA-1: Translational regulator; nucleates SGs; SG assembly factor; splicing regulator<br>Pub1: mRNA stability; SG assembly | SGs, PBs (yeast)             | Mammals, yeast | Kedersha et al, 1999; Buchan et al, 2008                    |
| <b>TIA-R/Ngr1</b> | TIA-R Translational regulator; nucleates SGs; splicing regulator<br>Ngr1: mRNA stability                                   | SGs, PBs (yeast)             | Mammals, yeast | Kedersha et al, 1999; Buchan et al, 2008                    |
| <b>TNRC6B</b>     | miRNA repression                                                                                                           | PBs                          | Mammals        | Mesiter et al, 2005;                                        |
| <b>TRAF2</b>      | TNF $\alpha$ signaling                                                                                                     | SGs                          | Mammals        | Kim et al, 2005                                             |
| <b>TTP</b>        | mRNA decay                                                                                                                 | SGs, PBs                     | Mammals        | Stoecklin et al, 2004<br>Kedersha et al, 2005               |
| <b>Upf1</b>       | RNA helicase; NMD factor                                                                                                   | PBs                          | Mammals, Yeast | Sheth and Parker, 2006;<br>Durand et al, 2007               |
| <b>Upf2</b>       | NMD factor                                                                                                                 | PBs                          | Mammals, Yeast | Sheth and Parker, 2006;<br>Stalder and Muhlemann, 2009      |
| <b>Upf3</b>       | NMD factor                                                                                                                 | PBs                          | Mammals, Yeast | Sheth and Parker, 2006;<br>Stalder and Muhlemann, 2009      |
| <b>Vts1</b>       | mRNA stability                                                                                                             | PBs                          | Yeast          | Rendel et al, 2008                                          |
| <b>Xrn1</b>       | 5'-3' exoribonuclease                                                                                                      | SGs, PBs                     | Mammals, yeast | Kedersha et al, 2005                                        |
| <b>YB-1</b>       | RNA/DNA binding protein; transcriptional regulator; splicing; translational regulator; mRNA stability                      | Polysomes, SGs               | Mammals        | Yang and Bloch, 2007<br>Ishiura et al, 2008                 |
| <b>Ygr250c</b>    | Putative RNA binding protein                                                                                               | SGs, PBs                     | Yeast          | Buchan et al, 2008                                          |
| <b>ZBP1</b>       | Translational repressor; mRNA stability                                                                                    | SGs                          | Mammals        | Stohr et al, 2006                                           |

**Table S2: Calculated exchange rates of granule components via FRAP**

| Factor                    | Granule          | Granule inducing condition*                 | Organism                                      | Relative Recovery rate**                                                      | Category *** | Immobile fraction****        | Reference                     |
|---------------------------|------------------|---------------------------------------------|-----------------------------------------------|-------------------------------------------------------------------------------|--------------|------------------------------|-------------------------------|
| $\beta$ -gal MS2-GFP mRNA | SG               | Arsenite                                    | Human Cell lines (Hela)                       | 63% recovery within 30s - Estimated 1min max residency time                   | Fast         | ? (Close to a full recovery) | Mollet et al, 2008            |
| Ago2                      | PB               | Overexpression                              | Hypothalamic rat neurons (Soma and dendrites) | 25% recovery within 5 mins                                                    | Very slow    | 80%                          | Cougot et al, 2008            |
| Ago2                      | SG               | Hippuristanol                               | Human Cell lines (Hela)                       | 55% recovery within 30s                                                       | Fast         | No, full recovery            | Leung and Sharp, 2006         |
| Ago2                      | PB               | Hippuristanol                               | Human Cell lines (Hela)                       | 15% recovery within 1 min                                                     | Slow         | 50%                          | Leung and Sharp, 2006         |
| CPEB                      | SG               | Overexpression                              | Human Cell lines (Hela)                       | 50% recovery within 30s                                                       | Medium       | No, full recovery            | Mollet et al, 2008            |
| CPEB                      | SG               | Arsenite                                    | Human Cell lines (Hela)                       | 40% recovery within 30s                                                       | Medium       | 50%                          | Mollet et al, 2008            |
| CUGBP1                    | SG               | Arsenite                                    | Human Cell lines (Hela)                       | 50% recovery within 60s                                                       | Medium       | ?                            | Fujimura et al, 2007          |
| Dcp1a                     | PB               | Overexpression                              | Human Cell lines (COS)                        | 62% recovery within 30s; note slower exchange from big PBs, faster from small | Fast         | ? (close to full recovery)   | Kedersha et al, 2005          |
| Dcp1a                     | PB               | Overexpression / + nocodazole / + puromycin | Human Cell lines (U2OS)                       | 70% recovery to within 20s                                                    | Fast         | ? (close to a full recovery) | Aizer et al, 2008             |
| Dcp1a                     | PB               | Overexpression                              | Hypothalamic rat neurons (Soma and dendrites) | 6% recovery after 5 mins                                                      | Very slow    | 90%                          | Cougot et al, 2008            |
| Dcp1a                     | PB               | Overexpression + synaptic stimulation       | Hypothalamic rat neurons                      | 45% recovery after 30s                                                        | Medium       | ?                            | Cougot et al, 2008            |
| Dcp1b                     | PB               | Overexpression / + nocodazole / + puromycin | Human Cell lines (U2OS)                       | 50% recovery after 30s                                                        | Medium       | 25%                          | Aizer et al, 2008             |
| Dcp2                      | PB               | Overexpression / + nocodazole / + puromycin | Human Cell lines (U2OS)                       | No recovery within 50s                                                        | Near static  | $\leq$ 100%                  | Aizer et al, 2008             |
| eIF4E                     | PB               | Overexpression                              | Human Cell lines (Hela)                       | Recovery of 50% in 90s                                                        | Medium       | 30%                          | Andrei et al, 2005            |
| eIF4E-T                   | PB               | Overexpression                              | Human Cell lines (Hela)                       | Recovery of 25% in 90s                                                        | Slow         | 75%                          | Andrei et al, 2005            |
| FAST                      | SG               | Arsenite                                    | Human Cell lines (COS)                        | 12.5% recovery within 30s                                                     | Slow         | ?                            | Kedersha et al, 2005          |
| G3BP                      | SG               | Arsenite                                    | Human Cell lines (COS)                        | 100% recovery within 30s                                                      | Fast         | No, full recovery            | Kedersha et al, 2005          |
| GW182                     | PB               | Overexpression                              | Human Cell lines (COS)                        | 18% recovery within 30s                                                       | Slow         | ?                            | Kedersha et al, 2005          |
| hnRNP A1                  | SG               | Arsenite                                    | Human cell lines (Hela)                       | 67% recovery within 24s                                                       | Fast         | ? (close to full recovery)   | Guil et al, 2006              |
| Lsm6                      | PB               | Overexpression                              | Human Cell lines (Hela)                       | Recovery of 75% in 150s                                                       | Medium       | 20%                          | Andrei et al, 2005            |
| PABP                      | SG               | Arsenite                                    | Human Cell lines (COS)                        | 45% recovery within 30s                                                       | Medium       | ?                            | Kedersha et al, 2005          |
| PABP                      | SG               | Arsenite                                    | Human cell lines (Hela)                       | 15% recovery within 80s                                                       | Slow         | ?                            | Guil et al, 2006              |
| PCBP2                     | SG and PB        | Arsenite                                    | Human Cell lines (Hela)                       | 65% recovery in 30s                                                           | Fast         | 20%                          | Fujimura et al, 2008          |
| RSK2                      | SG               | Serum starved                               | Human Cell lines (MCF-7)                      | No recovery over 10mins                                                       | Near static  | $\leq$ 100%                  | Eisinger-Mathason et al, 2008 |
| RSK2                      | SG               | Serum starved + mitogen                     | Human Cell lines (MCF-7)                      | 60% recovery within 20s                                                       | Fast         | ?                            | Eisinger-Mathason et al, 2008 |
| Staufen                   | Neuronal granule | Overexpression                              | <i>Drosophila</i> motor neurons               | 30% recovery within 10mins                                                    | Very slow    | ?                            | Barbee et al, 2006            |
| TIA-1                     | SG               | Arsenite                                    | Human Cell lines (COS)                        | 100% within 22-30s; 90% within 10s                                            | Fast         | No, full recovery            | Kedersha et al, 2000; 2005    |
| TIA-1                     | SG               | Arsenite                                    | Human cell lines (Hela)                       | 67% recovery within 24s                                                       | Fast         | No, full recovery            | Guil et al, 2006              |
| TTP                       | SG and PB        | Overexpression                              | Human Cell lines (COS)                        | 90% recovery within 30s                                                       | Fast         | ? (close to a full recovery) | Kedersha et al, 2005          |

\*For FRAP purposes, GFP/YFP tagged versions of proteins are usually overexpressed in cells, thus the possibility exists in every dataset that exchange rates may be non-physiological due to artificial levels/granule induction. Note, ‘overexpression’ used in this table essentially means no other stress condition, bar expression of the GFP/YFP protein itself, which often is sufficient to induce SGs. PBs are already visible, but may be additionally stimulated.

\*\*Numbers are approximations of recovery relative to the amount of protein photobleached, which varies between experiments (e.g. a protein that is 50% photobleached, and which recovers to 75% of original signal, will have recovered relatively by 50%).

\*\*\* Near static = no detectable fluorescence recovery; Very slow = <10% recovery over 2 minutes; Slow = >10% but <50% recovery over 2 minutes; Medium = >50% recovery over 2 minutes <50% recovery over 30s; Fast = >50% recovery over 30s

\*\*\*\* '?' Indicates recovery either appeared to be increasing beyond timeframe examined in experiment, thus complete, slow recovery cannot be ruled out, or that only select timepoints of recovery were presented.
